# Supplementary material for: Global-scale drought risk assessment for agricultural systems
Source: Copernicus journal article supplement (doi:10.5194/nhess-2019-255), 2019-08-02
Supplement: Supplementary file 1 [file nhess-2019-255-supplement.pdf]

## Supplementary Material

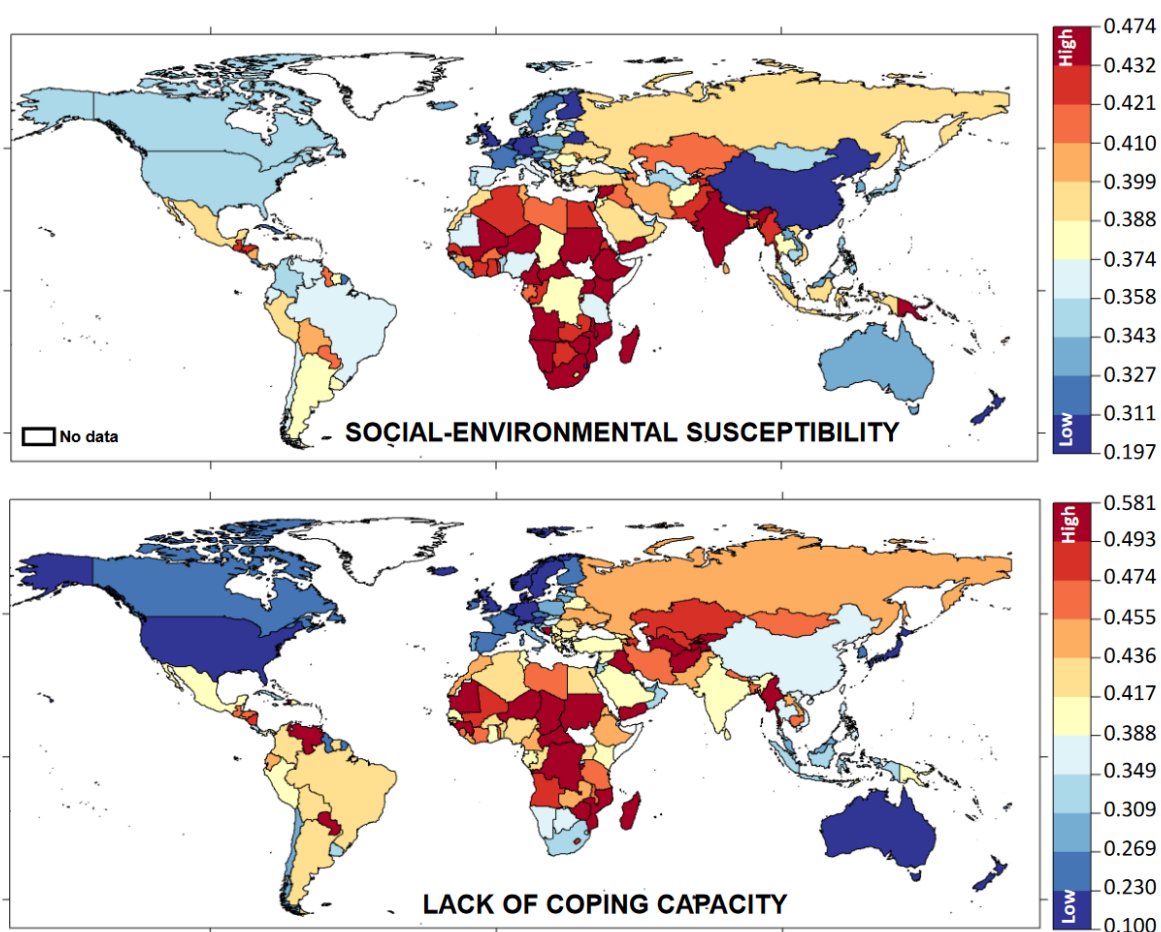

**Figure S1.** Social-environmental susceptibility and lack of coping capacity by country

**Table S2.** Final indicators for the vulnerability assessment and their respective code

| Indicator                                                            | CODE   |
|----------------------------------------------------------------------|--------|
| <b>Social susceptibility (SOC_SUS)</b>                               |        |
| Prevalence of conflict/insecurity                                    | C_STA1 |
| Dependency ratio (Population ages 15-64 (% of total population))     | E_DEP  |
| Unemployment, total (% of total labor force) (national estimate)     | E_EMP  |
| Share of GDP from agr., forestry and fishing in US\$ (%)             | E_INC  |
| GINI index                                                           | E_INQ  |
| Proportion of population living below the national poverty line (%)  | E_POV  |
| Agricultural machinery, tractors per 100 sq. km of arable land       | F_ATEC |
| Insecticides and pesticides used (ton/ha)                            | F_INPE |
| Electricity production from hydroelectric sources (% of total)       | P_ELE  |
| Population using at least basic sanitation services (%)              | P_W&S2 |
| Access to improved water sources (% of total population with access) | P_W&S1 |
| DALYs (Disability-Adjusted Life Years)(DALYs per 100,000, Rate)      | S_DISP |
| Literacy rate, adult total (% of people ages 15 and above)           | S_EDU  |
| Gender Inequality Index                                              | S_GNDR |
| Healthy life expectancy (HALE) at birth (years)                      | S_LEB  |
| Prevalence of undernourishment (% of population)                     | S_NUT  |
| Rural population (% of total population)                             | S_RUR  |

| <b>Ecological susceptibility (ECO_SUS)</b>                           |         |
|----------------------------------------------------------------------|---------|
| Average land degradation in GLASOD erosion degree                    | E_DEGR  |
| Terrestrial and marine protected areas (% of total territorial area) | E_PROA  |
| Average soil erosion                                                 | E_SOIL2 |
| Fertilizer consumption (kilograms per hectare of arable land)        | F_FERT  |
| <b>Lack of coping capacity (COP)</b>                                 |         |
| Saved any money in the past year (% age 15+)                         | E_SAV   |
| Corruption Perception Index (CPI)                                    | G_CORP  |
| Government Effectiveness: Percentile Rank                            | G_REP   |
| Total renewable water resources per capita (m3/inhab/year)           | P_RW    |
| Travel time to cities ≤30 min (population) (%)                       | P_TRNS  |
| Total dam storage capacity per capita. Unit: m3/inhab                | P_WAT   |

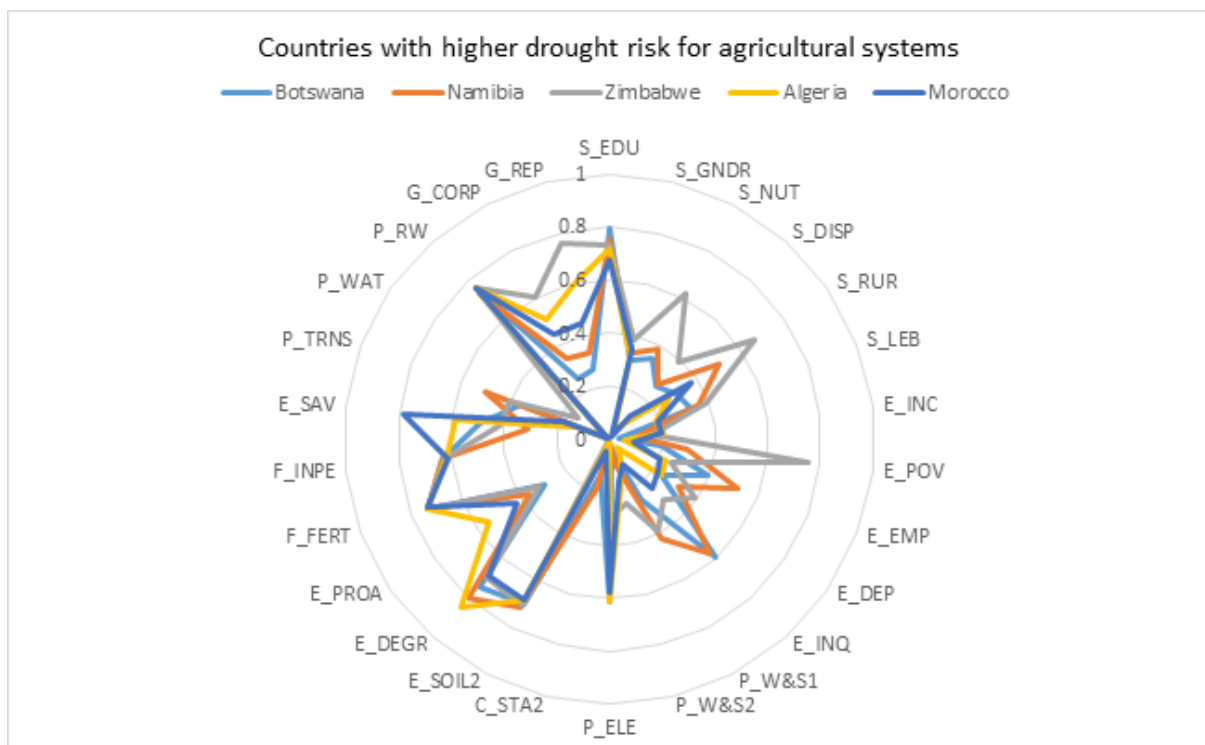

**Figure S3.** Weighted normalized vulnerability indicators scores for the five countries with highest drought risk for combined agricultural systems (irrigated and rain-fed)

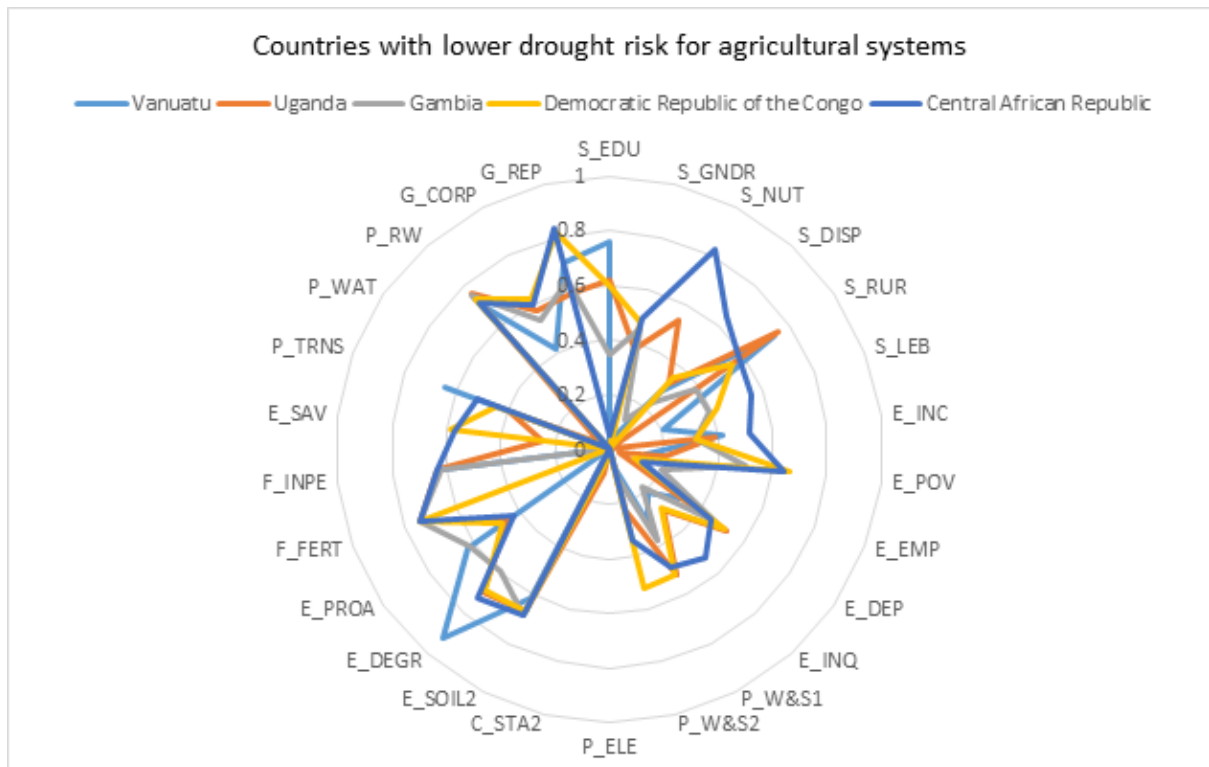

**Figure S4.** Weighted normalized vulnerability indicators scores for the five countries with lowest drought risk for combined agricultural systems (irrigated and rain-fed).
